# Supplementary material for: The Use of Thioflavin T for the Estimation and Measurement of the Plasma Membrane Electric Potential Difference in Different Yeast Strains
Source: MDPI journal article supplement (doi:10.3390/jof9090948), 2023-09-20
Supplement: s1 [file s1]

Supplementary Figure S1A.

*Saccharomyces cerevisiae* Azteca

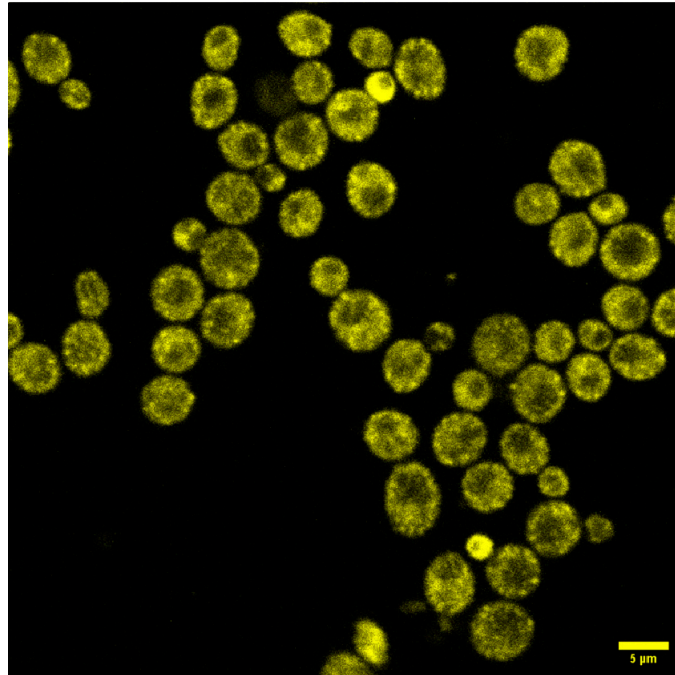

*Saccharomyces cerevisiae* W303

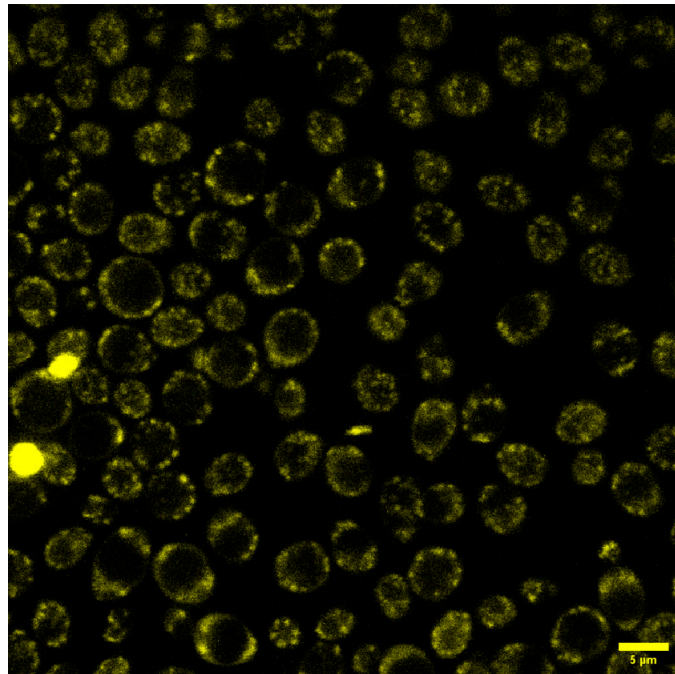

**Figure S1. A.** Control images enlargement of the different strains of Figure 5.

Supplementary Figure S1B.

*Candida albicans*

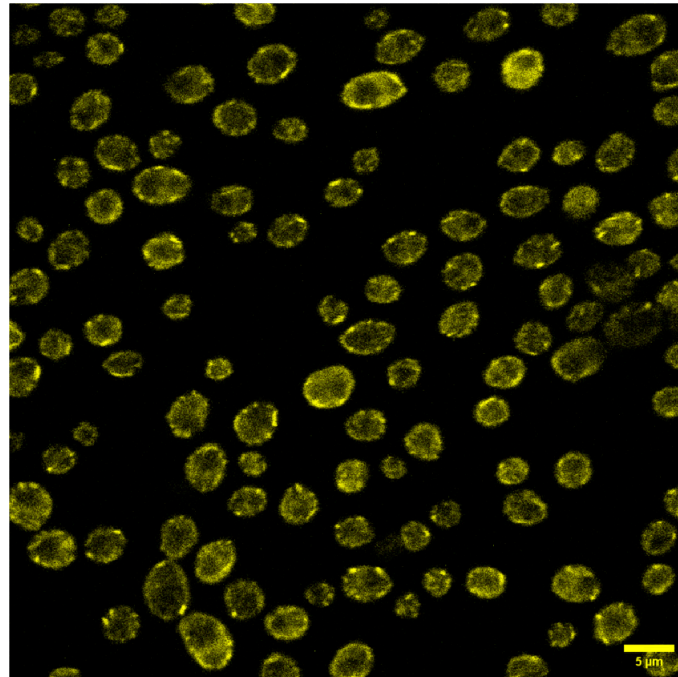

*Debaryomyces hansenii*

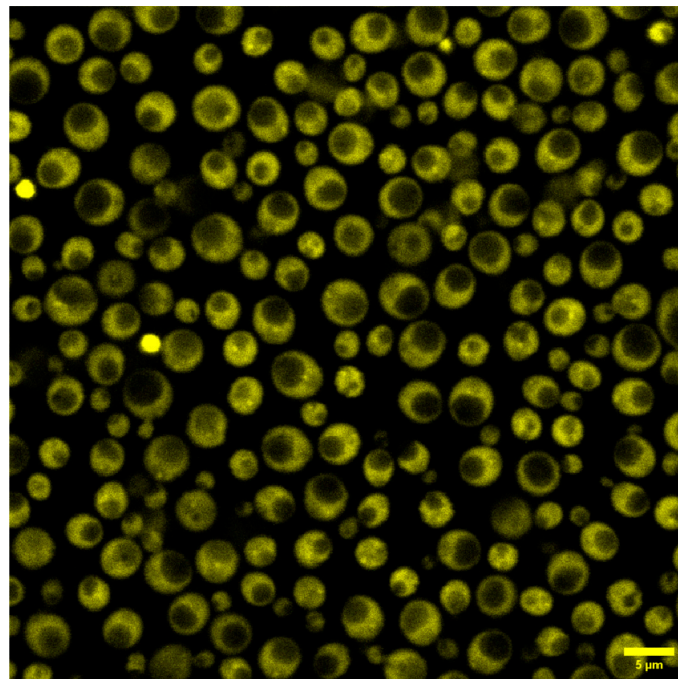

Figure S1. B. Control images enlargement of the different strains of Figure 5.

Supplementary Figure S1C.

*Meyerozyma guilliermondii*

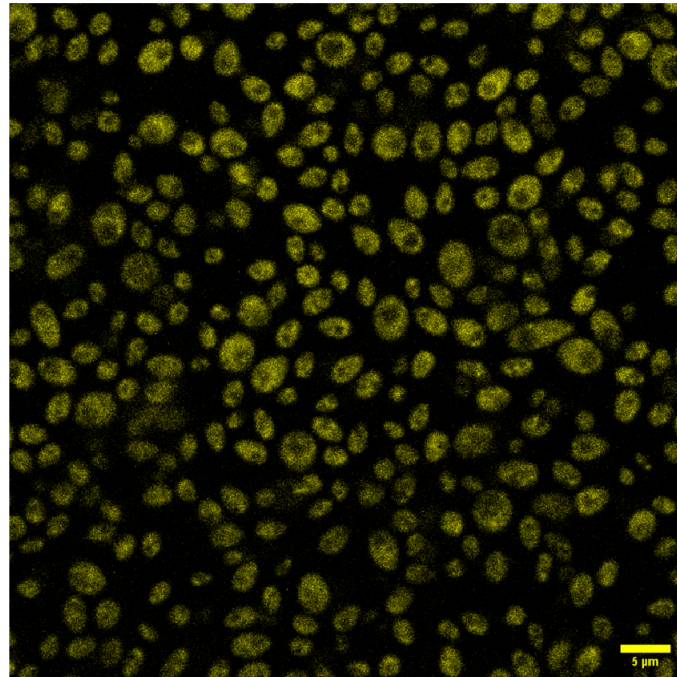

*Rhodotorula mucilaginosa*

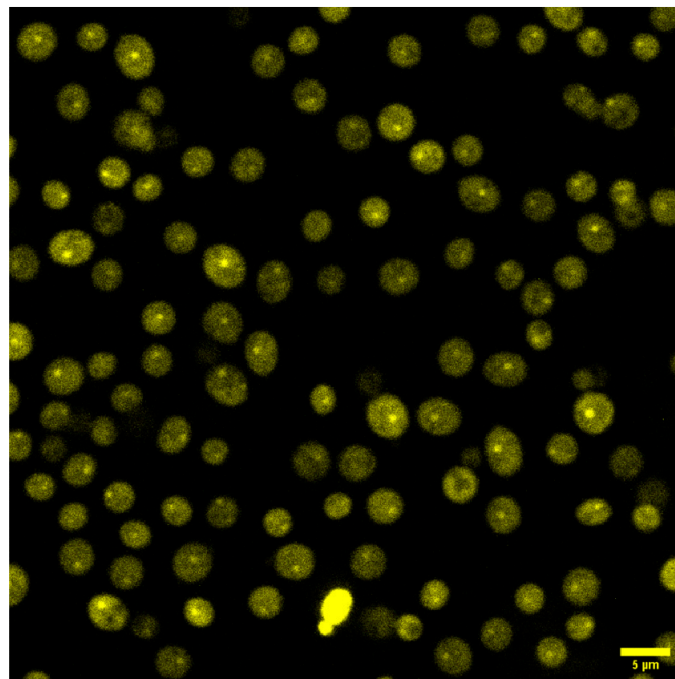

Figure S1. C. Control images enlargement of the different strains of Figure 5.

## Supplementary Figure S2.

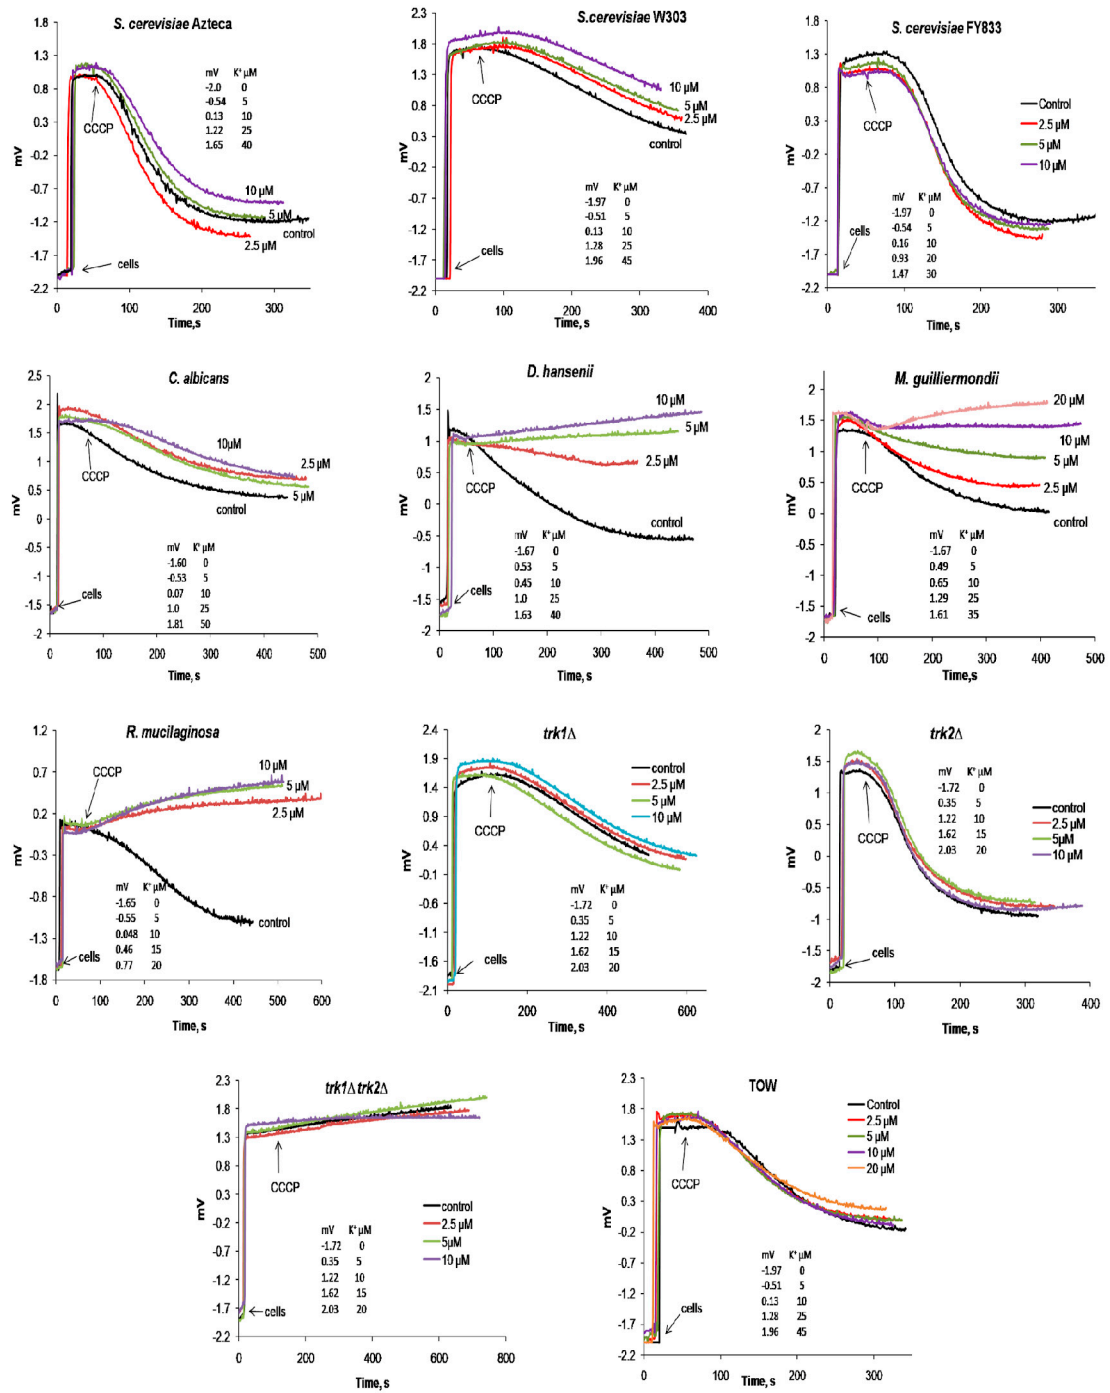

**Figure S2.** Effects of different CCCP concentrations on the K<sup>+</sup> uptake. The medium used was 2 mM MES-TEA buffer, pH 6.0, 20 mM glucose. Tracings were started by the addition of 100 mg of cells (w. w.). Where indicated, variable concentrations of CCCP were added. A standard curve for the tracings was performed by the successive addition of 0 to 50 μM (specified in the insert).



### Supplementary Figure S3

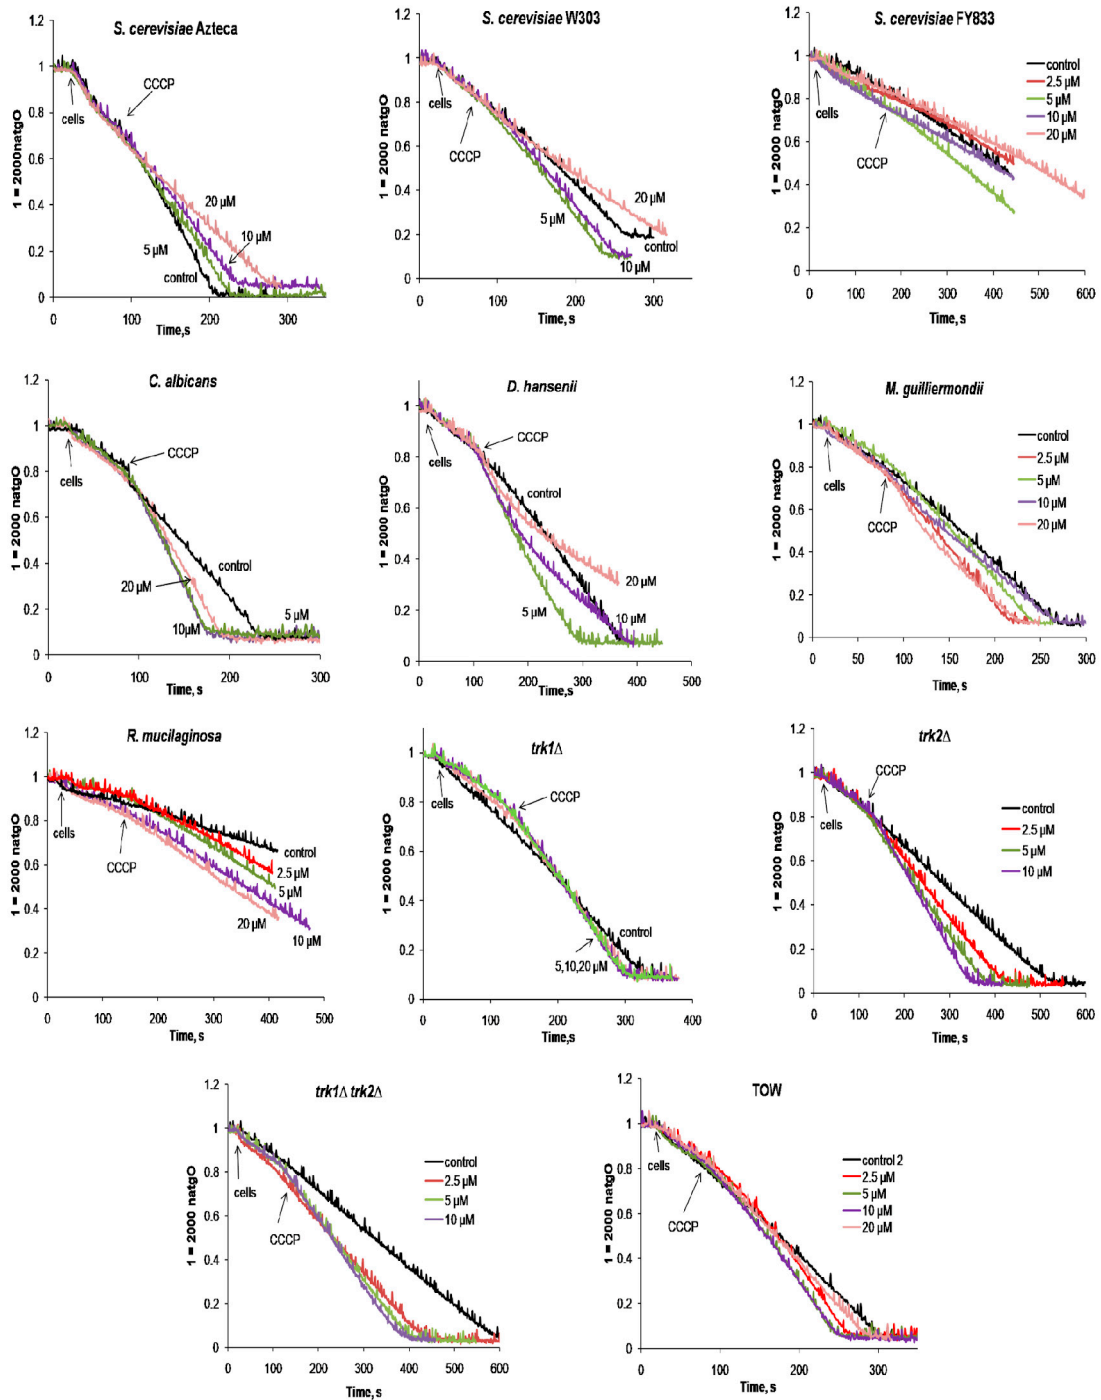

**Figure S3.** Effects of different CCCP concentrations on oxygen consumption. The medium used was 10 mM MES-TEA buffer, pH 6.0, 20 mM glucose. Tracings were started by the addition of 50 mg of cells (w. w.). Where indicated, variable concentrations of CCCP were added.
